# Supplementary material
Source: MDPI journal article supplement (https://www.mdpi.com/2304-6740/5/4/85)
Supplement: s1 [file s1]

## SUPPORTING INFORMATION

### DOI:

**Title:** Reactivity of zinc halide complexes containing camphor-derived guanidine ligands with technical *rac*-lactide

**Author(s):** Angela Metz, Joshua Heck, Clara Marie Gohlke, Konstantin Kröckert, Yannik Louven, Paul McKeown, Alexander Hoffmann, Matthew D. Jones and Sonja Herres-Pawlis

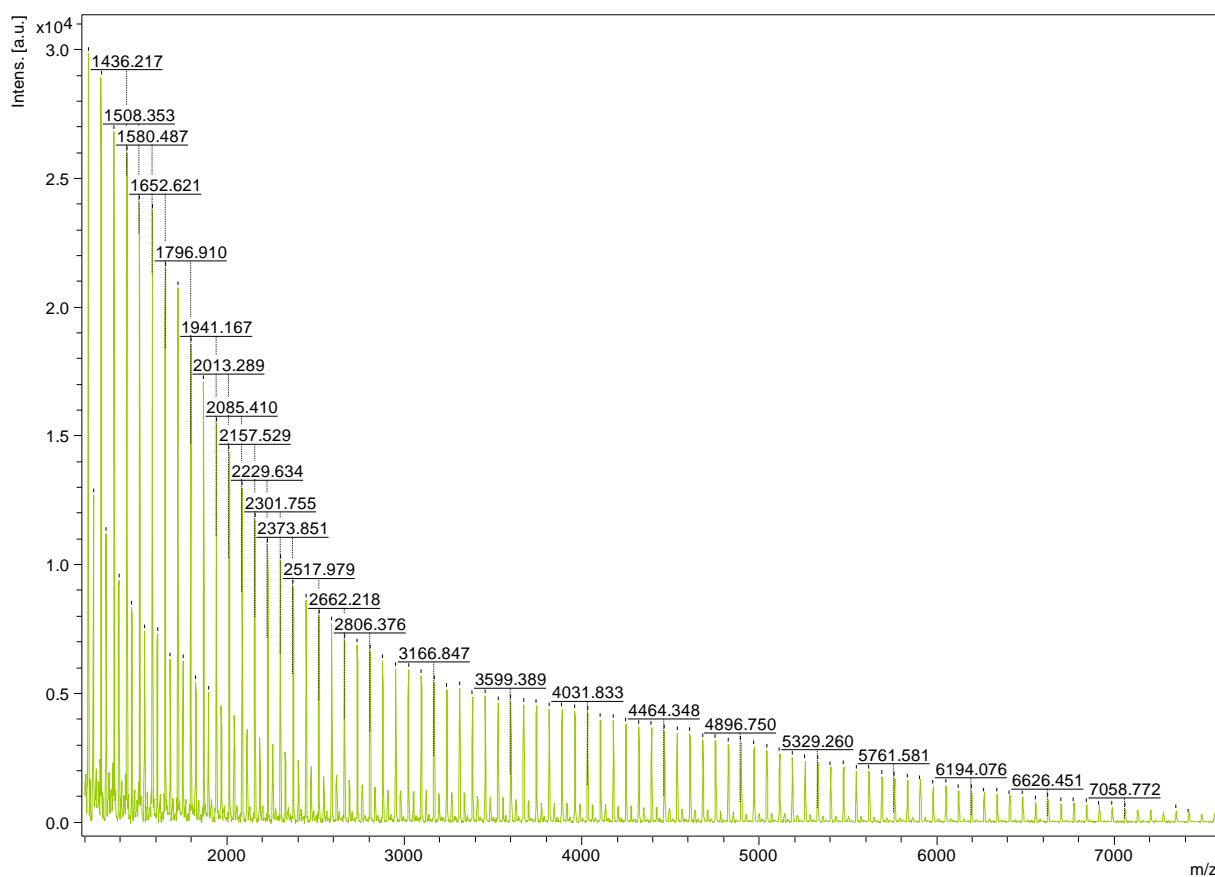

**Figure S1:** MALDI-ToF measurement for polymerization method **a** after 1 h. Conditions: 500:1([Zn(TMGa)Cl<sub>2</sub>], C1), 150°C, technical *rac*-lactide.  $M_n=10000$  g/mol,  $M_w=17000$  g/mol,  $\bar{D}=1.72$ .

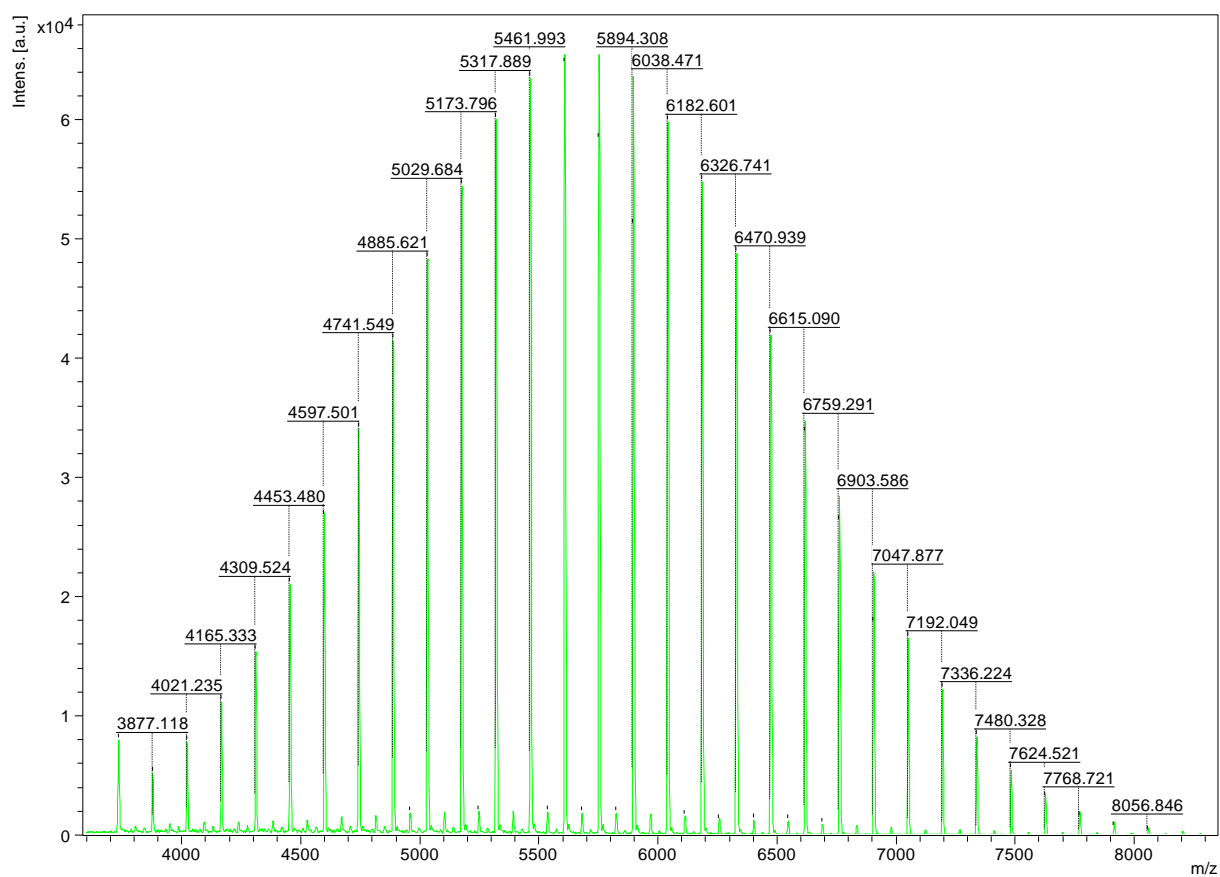

**Figure S2:** MALDI-ToF measurement for polymerization method **c** after 7 h. Conditions: 1000:1 ([Zn(DMEGca)Cl<sub>2</sub>], **C2**):10 [BzOH], 140°C, 400 rpm, recrystallised *rac*-lactide.  $M_n$ = 8000 g/mol,  $M_w$ =9500 g/mol,  $\bar{D}$ =1.15.
